# Supplementary material
Source: PubMed Central journal article supplement (PMC9857809)
Supplement: jamapsychiatry-e224599-s002.pdf [file jamapsychiatry-e224599-s002.pdf]

## Data Sharing Statement

Bagautdinova. Sleep Abnormalities in Different Clinical Stages of Psychosis. *JAMA Psychiatry*. Published January 18, 2023. doi:10.1001/jamapsychiatry.2022.4599

### Data

**Data available:** No

### Additional Information

**Explanation for why data not available:** No individual data has been collected for this meta-analysis.
